# Supplementary material for: Z3495, a LysR-Type Transcriptional Regulator Encoded in O Island 97, Regulates Virulence Gene Expression in Enterohemorrhagic Escherichia coli O157:H7
Source: MDPI journal article supplement (doi:10.3390/microorganisms12010140), 2024-01-10
Supplement: s1 [file s1]

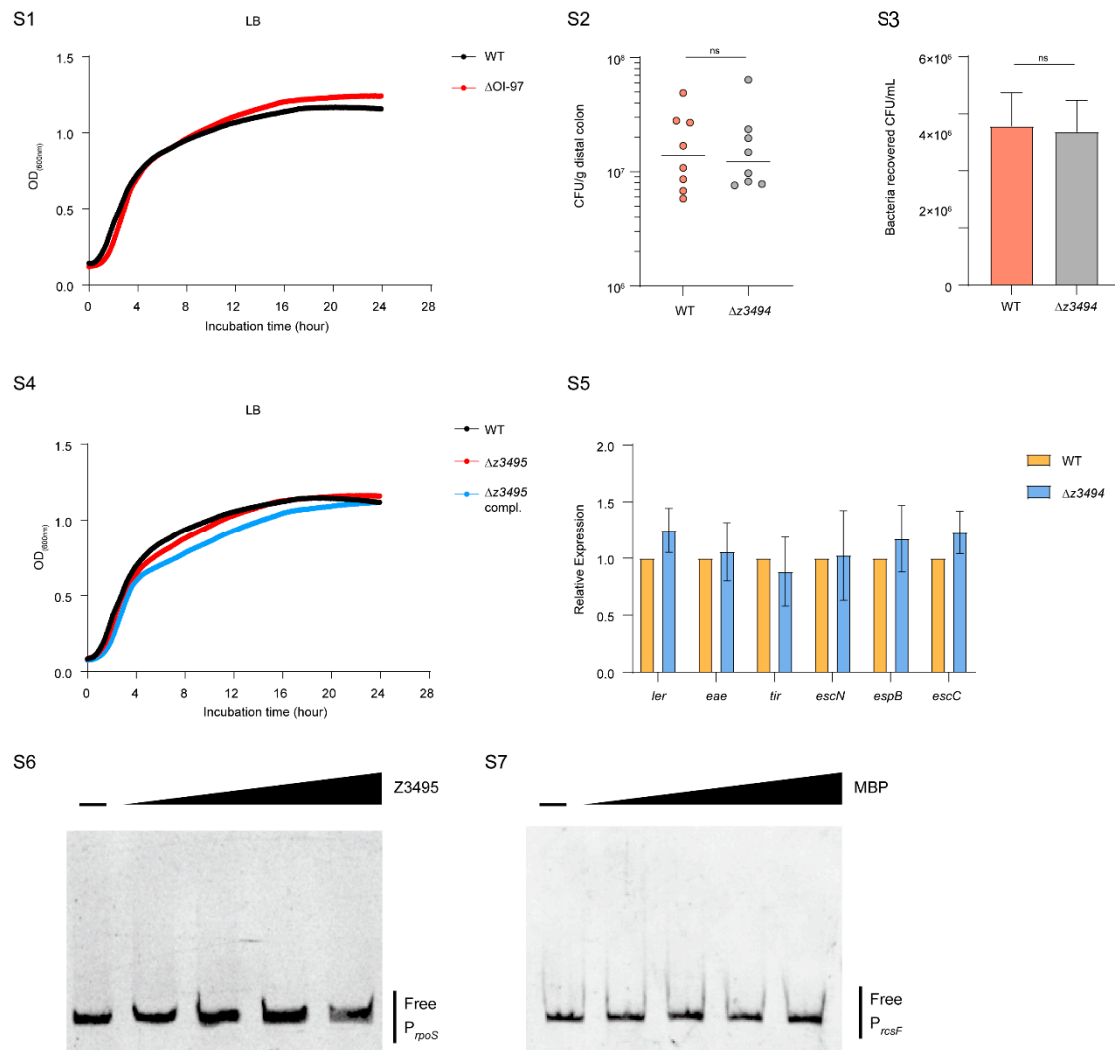

**Figure S1.** Growth curves of NMEC and ΔOI-97 in LB.

**Figure S2.** Evaluation of the adherence capacity of O157 WT and Δz3494 in the distal colon of mice at 6 h.

**Figure S3.** Adhesion of O157 WT and Δz3494 strains to HeLa cells in DMEM.

**Figure S4.** Growth curves of NMEC, Δz3495 and Δz3495 complement strain in LB

**Figure S5.** qRT-PCR of the expression of LEE genes in WT and Δz3494.

**Figure S6.** EMSA of the specific binding of Z3495 to *rpoS*.

**Figure S7.** EMSA of the specific binding of MBP to *rcsF*.

Data represent mean ± SD (n = 3).
