# Supplementary material for: Z3495, a LysR-Type Transcriptional Regulator Encoded in O Island 97, Regulates Virulence Gene Expression in Enterohemorrhagic Escherichia coli O157:H7
Source: Microorganisms. 2024 Jan 10;12(1):140. doi: 10.3390/microorganisms12010140 (PMC10819331; doi:10.3390/microorganisms12010140)
Supplement: Supplementary file 1 [file microorganisms-12-00140-s001.zip]

Archive with 5 entries (5 files):
- Supplementary Figure.pdf
- Supplementary Table S2.xlsx
- Supplementary Table S3.xlsx
- Supplementary Table S4.xlsx
- Supplementray Table S1.xlsx
