# Supplementary material for: Z3495, a LysR-Type Transcriptional Regulator Encoded in O Island 97, Regulates Virulence Gene Expression in Enterohemorrhagic Escherichia coli O157:H7
Source: Microorganisms. 2024 Jan 10;12(1):140. doi: 10.3390/microorganisms12010140 (PMC10819331; doi:10.3390/microorganisms12010140)
Supplement: Supplementary file 1 [file microorganisms-12-00140-s001.zip › Supplementary Table S2.xlsx]

## Sheet: Sheet1
Plasmids
pKD46	Red recombination plasmid, ApR
pKD3	Containing a chloramphenicol resistance cassette and the flipase recognition sites, CmR
pKD4	Containing a kanamycin resistance cassette and the flipase recognition sites, KmR
pBAD33	low copy number expression vector, CmR
pTRC99A	Expression vector, ApR
pMal-c5X	Expression vector, ApR
pz3495-MBP	pMal-c5X carrying z3495, ApR
pz3495-3×flag	pTRC99A carrying z3495-3×FLAG, ApR
