# Supplementary material for: Z3495, a LysR-Type Transcriptional Regulator Encoded in O Island 97, Regulates Virulence Gene Expression in Enterohemorrhagic Escherichia coli O157:H7
Source: Microorganisms. 2024 Jan 10;12(1):140. doi: 10.3390/microorganisms12010140 (PMC10819331; doi:10.3390/microorganisms12010140)
Supplement: Supplementary file 1 [file microorganisms-12-00140-s001.zip › Supplementary Table S3.xlsx]

## Sheet: Sheet1
Primers
Target gene	Sequence (5'-3')	F/R	Experiment
OI-97	CCACCAGCCACTACCACTAATAGTGCGCCCAGCAGATAAAGTGTAGGCTGGAGCTGCTTC	F	Mutation construction
	TCAGGCAGTCTTGCATTTGTCATCAATCTCATGTCTTACAATGGGAATTAGCCATGGTCC	R
	ACAATGACTATAGGTGGTTACCTG	F	Identification
	GGCAGTCTTGCATTTGTCATC	R
z3494	CCACCAGCCACTACCACTAATAGTGCGCCCAGCAGATAAAGTGTAGGCTGGAGCTGCTTC	F	Mutation construction
	ACTCTACCGCCTGTCAGGATGACGCACGCAGACAACACTCATGGGAATTAGCCATGGTCC	R
	ACAATGACTATAGGTGGTTACCTG	F	Identification
	ACGCACGCAGACAACAC	R
z3495	AAATTAATCGTTTTAATATTATTGATTAGCAAACTCTAATGTGTAGGCTGGAGCTGCTTC	F	Mutation construction
	TCAGGCAGTCTTGCATTTGTCATCAATCTCATGTCTTACAATGGGAATTAGCCATGGTCC	R
	ATGGCGGCATGCTATTAGAGAAAT	F	Identification
	GGCAGTCTTGCATTTGTCATC	R
	CTAGTCTAGAATGACTCTTACCCAAATAAATTCT	F	Complement construction
	CCCAAGCTTTCAAATTTTTCCACTCACCACT	R
	GAAGAAACCAATTGTCCATATTGC	F	Complement identification
	TGAAAATCTTCTCTCATCCGCC	R
	GCCCTCGAACAAGAACTTGGTG	F	qRT-PCR
	CACAACCGGTAAGATACAGGCGC	R
	CGCGGATCCATGACTCTTACCCAAATAAATTCT	F	z3495-MBP construction
	CCCAAGCTTTCAAATTTTTCCACTCACCACT	R
	GGTGAAATCATGCCGAACATCC	F	z3495-MBP identification
	TCGCAACGTTCAAATCCGCT	R
	ATGACTCTTACCCAAATAAATTCT	F	z3495-3×flag construction
	TCAAATTTTTCCACTCACCGACTACAAAGACCATGACGGTGATTATAAAGATCATGATATCGACTACAAAGATGACGACGATAAATAGTAA	R
	GAGCGGATAACAATTTCACACAGG	F	z3495-3×flag identification
	GATTTAATCTGTATCAGG	R
ler	GCGAGAGCAGGAAGTTCAAAGT	F	qRT-PCR
	GTGCTTCTTTAAGCCAGCGTGG	R
eae	GGTCTGGATCGTATCGTCTGGGA	F	qRT-PCR
	AACCTGGTCGACAACTTGACCAT	R
tir	AATTGGTGTTGCCGTCACCG	F	qRT-PCR
	CGGATTCTGCACGGTCCC	R
espB	ACGATGGTTAATTCCGCTTCGG	F	qRT-PCR
	CGCCAACCAAAGCAGCGG	R
escC	GGCAAGTAATGGTTCACTTCCCAG	F	qRT-PCR
	CCTTGTCCTGCATTTAACGTACCGG	R
escN	CTTCCGTTTGAACGCAGCTTGT	F	qRT-PCR
	ACTTCGCGACCACGTTCG	R
16s	GAAAGCGTGGGGAGCAAAC	F	qRT-PCR
	ACATGCTCCACCGCTTGTG	R
rcsF	GCGTGCTTTACCGATCTGTTTAG	F	qRT-PCR
	GCCACTGACTTCACCGAGATCG	R
	AGCATGAGTGCTACTAAACAGA	F	EMSA
	GGTATCTTTGTCGAAGATAAAGAC	R
	GACAAGACGGGCAAGCGC	F	ChIP-qPCR
	CGAAGATAAAGACTCCCCGTACGT	R
rcsB	TGCCTGGCGATAAGTACGGC	F	qRT-PCR
	TGTCACCGTAACCTCCAGCAC	R
rcsC	TAGTGCTCTGGCTGTTGATTGCT	F	qRT-PCR
	ACAGCGGTTCAAACGCAGG	R
rcsD	CGTCGATACCTGGCGTTACGT	F	qRT-PCR
	GGTTGAGATCAGCACCAGACTGT	R
rpoS	GTTATCGCAGGGAGCCACA	F	EMSA
	TTTTACCACCAGACGCAAGTTA	R
	ATTCGTTTGCCGATTCAC	F	ChIP-qPCR
	TCGTCATCTTGCGTGGTAT	R
LEE1	GCCTTCCTGTAACTCGAATT	F	EMSA
	CTTATCAGGAAGGACCAACAAT	R
LEE2/3	TAAAAACTCTTCAACGTTTC	F	EMSA
	TGAGTGAGGTCGCCAGCGGCAT	R
LEE4	AATTCCCGATTACGCATC	F	EMSA
	ATTAATTATGAATATTCCATTAAA	R
LEE5	GAATGTTTGCTGCAATTTTATT	F	EMSA
	TGGAGGTGCAGGAGGA	R
