# Supplementary material for: Z3495, a LysR-Type Transcriptional Regulator Encoded in O Island 97, Regulates Virulence Gene Expression in Enterohemorrhagic Escherichia coli O157:H7
Source: Microorganisms. 2024 Jan 10;12(1):140. doi: 10.3390/microorganisms12010140 (PMC10819331; doi:10.3390/microorganisms12010140)
Supplement: Supplementary file 1 [file microorganisms-12-00140-s001.zip › Supplementary Table S4.xlsx]

## Sheet: Sheet1
Start	End	Length	Log2_Fold-enrichment	Protein
12187	15257	3070	1.37451	gnl|BL_ORD_ID|102182 sp|Q0T8H5|DNAJ_SHIF8 Chaperone protein DnaJ OS=Shigella flexneri serotype 5b (strain 8401) OX=373384 GN=dnaJ PE=3 SV=1//0
16883	17138	255	1.22312	gnl|BL_ORD_ID|245451 sp|P33236|MOKC_ECOLI Regulatory protein MokC OS=Escherichia coli (strain K12) OX=83333 GN=mokC PE=3 SV=2//9.1725e-43
20731	21027	296	1.17889	gnl|BL_ORD_ID|409237 sp|Q3Z5Y7|RS20_SHISS 30S ribosomal protein S20 OS=Shigella sonnei (strain Ss046) OX=300269 GN=rpsT PE=3 SV=1//5.79316e-54
90689	90919	230	1.22554	gnl|BL_ORD_ID|139445 sp|P0AEN7|FTSL_SHIFL Cell division protein FtsL OS=Shigella flexneri OX=623 GN=ftsL PE=3 SV=1//9.2659e-68
106292	106900	608	1.27204	gnl|BL_ORD_ID|222042 sp|Q3Z5R3|LPXC_SHISS UDP-3-O-acyl-N-acetylglucosamine deacetylase OS=Shigella sonnei (strain Ss046) OX=300269 GN=lpxC PE=3 SV=1//0
175165	175462	297	1.22859	gnl|BL_ORD_ID|65577 sp|Q3Z5K2|CLCA_SHISS H(+)/Cl(-) exchange transporter ClcA OS=Shigella sonnei (strain Ss046) OX=300269 GN=clcA PE=1 SV=1//0
223289	223611	322	1.29267	-//-
224661	224898	237	1.80225	-//-
225923	226124	201	1.79744	gnl|BL_ORD_ID|541343 sp|Q3BAI2|YCX91_PHAAO Uncharacterized protein ORF91 OS=Phalaenopsis aphrodite subsp. formosana OX=308872 PE=4 SV=1//2.50832e-13
236767	237048	281	1.19669	-//-
237482	237802	320	1.23995	gnl|BL_ORD_ID|537402 sp|P77339|YAFT_ECOLI Uncharacterized lipoprotein YafT OS=Escherichia coli (strain K12) OX=83333 GN=yafT PE=3 SV=1//0
457575	458516	941	1.21455	gnl|BL_ORD_ID|67896 sp|Q3Z4W5|CLPX_SHISS ATP-dependent Clp protease ATP-binding subunit ClpX OS=Shigella sonnei (strain Ss046) OX=300269 GN=clpX PE=3 SV=1//0
458979	459180	201	1.20009	gnl|BL_ORD_ID|220173 sp|P0A9M0|LON_ECOLI Lon protease OS=Escherichia coli (strain K12) OX=83333 GN=lon PE=1 SV=1//0
460701	460972	271	1.1759	gnl|BL_ORD_ID|91652 sp|P0A1R8|DBHB_SALTY DNA-binding protein HU-beta OS=Salmonella typhimurium (strain LT2 / SGSC1412 / ATCC 700720) OX=99287 GN=hupB PE=3 SV=1//1.93701e-36
507551	507794	243	1.20975	gnl|BL_ORD_ID|537935 sp|P77301|YBAP_ECOLI Uncharacterized protein YbaP OS=Escherichia coli (strain K12) OX=83333 GN=ybaP PE=4 SV=1//0
517541	517780	239	1.19225	gnl|BL_ORD_ID|537965 sp|P77395|YBBN_ECOLI Uncharacterized protein YbbN OS=Escherichia coli (strain K12) OX=83333 GN=ybbN PE=1 SV=2//0
523435	523731	296	1.188	gnl|BL_ORD_ID|349639 sp|P16919|RHSD_ECOLI Protein RhsD OS=Escherichia coli (strain K12) OX=83333 GN=rhsD PE=2 SV=3//0
693255	693512	257	1.19112	gnl|BL_ORD_ID|303805 sp|P0A9K6|PHOL_SHIFL PhoH-like protein OS=Shigella flexneri OX=623 GN=ybeZ PE=3 SV=2//0
721236	721456	220	1.27359	gnl|BL_ORD_ID|204357 sp|P21866|KDPE_ECOLI KDP operon transcriptional regulatory protein KdpE OS=Escherichia coli (strain K12) OX=83333 GN=kdpE PE=1 SV=3//8.2375e-146
730053	730377	324	1.21637	gnl|BL_ORD_ID|349638 sp|P16918|RHSC_ECOLI Protein RhsC OS=Escherichia coli (strain K12) OX=83333 GN=rhsC PE=1 SV=4//0
730763	731081	318	1.2891	gnl|BL_ORD_ID|349638 sp|P16918|RHSC_ECOLI Protein RhsC OS=Escherichia coli (strain K12) OX=83333 GN=rhsC PE=1 SV=4//0
731378	731669	291	1.19113	gnl|BL_ORD_ID|349638 sp|P16918|RHSC_ECOLI Protein RhsC OS=Escherichia coli (strain K12) OX=83333 GN=rhsC PE=1 SV=4//0
771570	773441	1871	1.2187	gnl|BL_ORD_ID|85948 sp|P0ABK2|CYDB_ECOLI Cytochrome bd-I ubiquinol oxidase subunit 2 OS=Escherichia coli (strain K12) OX=83333 GN=cydB PE=1 SV=1//0
773590	774450	860	1.24339	gnl|BL_ORD_ID|538853 sp|P0AAV3|YBGE_SHIFL Uncharacterized protein YbgE OS=Shigella flexneri OX=623 GN=ybgE PE=4 SV=1//9.61426e-61
817113	817312	199	1.30545	gnl|BL_ORD_ID|244205 sp|P30745|MOAA_ECOLI GTP 3&apos;,8-cyclase OS=Escherichia coli (strain K12) OX=83333 GN=moaA PE=1 SV=1//0
818841	819696	855	1.22956	gnl|BL_ORD_ID|244768 sp|P30748|MOAD_ECOLI Molybdopterin synthase sulfur carrier subunit OS=Escherichia coli (strain K12) OX=83333 GN=moaD PE=1 SV=2//3.40277e-52
917980	918206	226	1.33607	gnl|BL_ORD_ID|539151 sp|P75829|YBJX_ECOLI Uncharacterized protein YbjX OS=Escherichia coli (strain K12) OX=83333 GN=ybjX PE=4 SV=1//0
921906	922291	385	1.21111	gnl|BL_ORD_ID|79983 sp|P0A971|CSPD_SHIFL Cold shock-like protein CspD OS=Shigella flexneri OX=623 GN=cspD PE=3 SV=1//5.1629e-39
933969	934243	274	1.22756	gnl|BL_ORD_ID|139355 sp|P46889|FTSK_ECOLI DNA translocase FtsK OS=Escherichia coli (strain K12) OX=83333 GN=ftsK PE=1 SV=2//0
939506	939849	343	1.20124	gnl|BL_ORD_ID|460457 sp|Q3Z3M7|SYS_SHISS Serine--tRNA ligase OS=Shigella sonnei (strain Ss046) OX=300269 GN=serS PE=3 SV=1//0
951334	952371	1037	1.18644	gnl|BL_ORD_ID|301139 sp|P0A9N7|PFLA_SHIFL Pyruvate formate-lyase 1-activating enzyme OS=Shigella flexneri OX=623 GN=pflA PE=3 SV=2//0
952567	952925	358	1.31204	gnl|BL_ORD_ID|301152 sp|P09373|PFLB_ECOLI Formate acetyltransferase 1 OS=Escherichia coli (strain K12) OX=83333 GN=pflB PE=1 SV=2//0
954086	954410	324	1.31204	gnl|BL_ORD_ID|135891 sp|P0AC23|FOCA_ECOLI Probable formate transporter 1 OS=Escherichia coli (strain K12) OX=83333 GN=focA PE=1 SV=1//0
1019229	1019528	299	1.21974	gnl|BL_ORD_ID|285808 sp|P0A910|OMPA_ECOLI Outer membrane protein A OS=Escherichia coli (strain K12) OX=83333 GN=ompA PE=1 SV=1//0
1142507	1142847	340	1.24956	gnl|BL_ORD_ID|387275 sp|P21513|RNE_ECOLI Ribonuclease E OS=Escherichia coli (strain K12) OX=83333 GN=rne PE=1 SV=6//1.51673e-17
1151787	1151977	190	1.25917	gnl|BL_ORD_ID|126183 sp|P0AAI8|FABF_SHIFL 3-oxoacyl-[acyl-carrier-protein] synthase 2 OS=Shigella flexneri OX=623 GN=fabF PE=3 SV=2//0
1172792	1173108	316	1.19189	gnl|BL_ORD_ID|236707 sp|P30958|MFD_ECOLI Transcription-repair-coupling factor OS=Escherichia coli (strain K12) OX=83333 GN=mfd PE=1 SV=2//0
1799894	1800332	438	1.21592	gnl|BL_ORD_ID|375855 sp|A4W9M5|RL35_ENT38 50S ribosomal protein L35 OS=Enterobacter sp. (strain 638) OX=399742 GN=rpmI PE=3 SV=1//3.61339e-22
1863250	1863559	309	1.19189	gnl|BL_ORD_ID|542319 sp|P39173|YEAD_ECOLI Putative glucose-6-phosphate 1-epimerase OS=Escherichia coli (strain K12) OX=83333 GN=yeaD PE=1 SV=2//0
1991751	1992172	421	1.3601	-//-
2141686	2142007	321	1.1835	gnl|BL_ORD_ID|28946 sp|P28249|ASMA_ECOLI Protein AsmA OS=Escherichia coli (strain K12) OX=83333 GN=asmA PE=3 SV=2//0
2232415	2232979	564	1.1817	gnl|BL_ORD_ID|426641 sp|P0AFY5|SANA_SHIFL Protein SanA OS=Shigella flexneri OX=623 GN=sanA PE=3 SV=1//6.34972e-152
2298889	2299261	372	1.23191	gnl|BL_ORD_ID|263507 sp|P0ABL4|NAPB_SHIFL Periplasmic nitrate reductase, electron transfer subunit OS=Shigella flexneri OX=623 GN=napB PE=3 SV=1//2.79322e-110
2299426	2300583	1157	1.28052	gnl|BL_ORD_ID|263536 sp|P33934|NAPH_ECOLI Ferredoxin-type protein NapH OS=Escherichia coli (strain K12) OX=83333 GN=napH PE=1 SV=1//0
2300762	2300958	196	1.23259	gnl|BL_ORD_ID|263535 sp|P0AAL5|NAPG_SHIFL Ferredoxin-type protein NapG OS=Shigella flexneri OX=623 GN=napG PE=3 SV=1//1.35371e-155
2301214	2301679	465	1.22161	gnl|BL_ORD_ID|263535 sp|P0AAL5|NAPG_SHIFL Ferredoxin-type protein NapG OS=Shigella flexneri OX=623 GN=napG PE=3 SV=1//1.35371e-155
2302304	2303436	1132	1.18227	gnl|BL_ORD_ID|263407 sp|P33937|NAPA_ECOLI Periplasmic nitrate reductase OS=Escherichia coli (strain K12) OX=83333 GN=napA PE=1 SV=3//0
2312398	2312652	254	1.18394	gnl|BL_ORD_ID|285846 sp|P06996|OMPC_ECOLI Outer membrane protein C OS=Escherichia coli (strain K12) OX=83333 GN=ompC PE=1 SV=1//0
2351168	2351414	246	1.22436	gnl|BL_ORD_ID|154657 sp|P09394|GLPQ_ECOLI Glycerophosphodiester phosphodiesterase, periplasmic OS=Escherichia coli (strain K12) OX=83333 GN=glpQ PE=1 SV=2//0
2352683	2353187	504	1.26581	gnl|BL_ORD_ID|153895 sp|P0A9C2|GLPA_SHIFL Anaerobic glycerol-3-phosphate dehydrogenase subunit A OS=Shigella flexneri OX=623 GN=glpA PE=3 SV=1//0
2353819	2354680	861	1.22864	gnl|BL_ORD_ID|153917 sp|P13033|GLPB_ECOLI Anaerobic glycerol-3-phosphate dehydrogenase subunit B OS=Escherichia coli (strain K12) OX=83333 GN=glpB PE=1 SV=1//0
2354951	2355299	348	1.18248	gnl|BL_ORD_ID|153976 sp|P0A996|GLPC_ECOLI Anaerobic glycerol-3-phosphate dehydrogenase subunit C OS=Escherichia coli (strain K12) OX=83333 GN=glpC PE=1 SV=1//0
2400407	2400728	321	1.20951	gnl|BL_ORD_ID|280839 sp|P33602|NUOG_ECOLI NADH-quinone oxidoreductase subunit G OS=Escherichia coli (strain K12) OX=83333 GN=nuoG PE=1 SV=4//0
2404666	2404908	242	1.2089	gnl|BL_ORD_ID|280070 sp|Q3YZS3|NUOB_SHISS NADH-quinone oxidoreductase subunit B OS=Shigella sonnei (strain Ss046) OX=300269 GN=nuoB PE=3 SV=1//2.85317e-164
2520922	2521231	309	1.29762	-//-
2530598	2530951	353	1.26838	gnl|BL_ORD_ID|555458 sp|B2TWZ6|ZIPA_SHIB3 Cell division protein ZipA OS=Shigella boydii serotype 18 (strain CDC 3083-94 / BS512) OX=344609 GN=zipA PE=3 SV=1//1.18052e-24
2533764	2534643	879	1.47544	gnl|BL_ORD_ID|324744 sp|P0AA09|PTHP_SHIFL Phosphocarrier protein HPr OS=Shigella flexneri OX=623 GN=ptsH PE=3 SV=1//2.3029e-54
2534991	2535295	304	1.31992	gnl|BL_ORD_ID|324606 sp|P69785|PTGA_SHIFL PTS system glucose-specific EIIA component OS=Shigella flexneri OX=623 GN=crr PE=3 SV=2//1.65808e-101
2716171	2716377	206	1.21956	gnl|BL_ORD_ID|160393 sp|Q3YYT6|GRCA_SHISS Autonomous glycyl radical cofactor OS=Shigella sonnei (strain Ss046) OX=300269 GN=grcA PE=3 SV=1//1.32709e-74
2731662	2732641	979	1.26398	-//-
2732989	2733352	363	1.28919	gnl|BL_ORD_ID|66170 sp|P63284|CLPB_ECOLI Chaperone protein ClpB OS=Escherichia coli (strain K12) OX=83333 GN=clpB PE=1 SV=1//0
2733664	2734127	463	1.32631	gnl|BL_ORD_ID|66170 sp|P63284|CLPB_ECOLI Chaperone protein ClpB OS=Escherichia coli (strain K12) OX=83333 GN=clpB PE=1 SV=1//0
2755345	2755832	487	1.21592	-//-
3184491	3184719	228	1.27015	gnl|BL_ORD_ID|350053 sp|Q3YXK0|RIBB_SHISS 3,4-dihydroxy-2-butanone 4-phosphate synthase OS=Shigella sonnei (strain Ss046) OX=300269 GN=ribB PE=3 SV=1//1.78907e-158
3322018	3322488	470	1.23279	-//-
3325513	3326695	1182	1.27879	gnl|BL_ORD_ID|139280 sp|P0AAI4|FTSH_SHIFL ATP-dependent zinc metalloprotease FtsH OS=Shigella flexneri OX=623 GN=ftsH PE=3 SV=1//0
3325513	3326695	1182	1.32291	gnl|BL_ORD_ID|139280 sp|P0AAI4|FTSH_SHIFL ATP-dependent zinc metalloprotease FtsH OS=Shigella flexneri OX=623 GN=ftsH PE=3 SV=1//0
3327288	3327581	293	1.2669	gnl|BL_ORD_ID|383407 sp|Q3YX62|RLME_SHISS Ribosomal RNA large subunit methyltransferase E OS=Shigella sonnei (strain Ss046) OX=300269 GN=rlmE PE=3 SV=1//2.77092e-151
3423295	3423694	399	1.33351	-//-
3440329	3440530	201	1.20567	gnl|BL_ORD_ID|360828 sp|Q3YWW5|RL17_SHISS 50S ribosomal protein L17 OS=Shigella sonnei (strain Ss046) OX=300269 GN=rplQ PE=3 SV=1//4.41643e-88
3440956	3441288	332	1.18364	gnl|BL_ORD_ID|393258 sp|Q3YWW4|RPOA_SHISS DNA-directed RNA polymerase subunit alpha OS=Shigella sonnei (strain Ss046) OX=300269 GN=rpoA PE=3 SV=1//0
3441599	3442050	451	1.1661	gnl|BL_ORD_ID|413168 sp|Q3YWW3|RS4_SHISS 30S ribosomal protein S4 OS=Shigella sonnei (strain Ss046) OX=300269 GN=rpsD PE=3 SV=1//3.77135e-149
3444190	3444488	298	1.25215	gnl|BL_ORD_ID|358783 sp|P02413|RL15_ECOLI 50S ribosomal protein L15 OS=Escherichia coli (strain K12) OX=83333 GN=rplO PE=1 SV=1//6.76542e-50
3445405	3445972	567	1.16956	gnl|BL_ORD_ID|361752 sp|P0C021|RL18_SHIFL 50S ribosomal protein L18 OS=Shigella flexneri OX=623 GN=rplR PE=3 SV=1//5.17135e-58
3453012	3453267	255	1.28598	gnl|BL_ORD_ID|400749 sp|Q3YWT8|RS10_SHISS 30S ribosomal protein S10 OS=Shigella sonnei (strain Ss046) OX=300269 GN=rpsJ PE=3 SV=1//1.46309e-68
3496268	3496778	510	1.18031	gnl|BL_ORD_ID|270433 sp|P0A9I8|NIRD_ECOLI Nitrite reductase (NADH) small subunit OS=Escherichia coli (strain K12) OX=83333 GN=nirD PE=1 SV=1//4.31532e-75
3600618	3600830	212	1.23545	gnl|BL_ORD_ID|395489 sp|P0AGB3|RPOH_ECOLI RNA polymerase sigma factor RpoH OS=Escherichia coli (strain K12) OX=83333 GN=rpoH PE=1 SV=1//0
3624532	3624810	278	1.33621	gnl|BL_ORD_ID|544773 sp|P28912|YHHI_ECOLI H repeat-associated putative transposase YhhI OS=Escherichia coli (strain K12) OX=83333 GN=yhhI PE=3 SV=1//0
3720056	3720319	263	1.32098	gnl|BL_ORD_ID|79929 sp|P0A9Y4|CSPA_SHIFL Cold shock protein CspA OS=Shigella flexneri OX=623 GN=cspA PE=3 SV=2//5.31597e-44
3765231	3765446	215	1.32343	gnl|BL_ORD_ID|545096 sp|P0ADK6|YIBA_ECOLI Protein YibA OS=Escherichia coli (strain K12) OX=83333 GN=yibA PE=1 SV=1//0
3866584	3867487	903	1.29171	gnl|BL_ORD_ID|186384 sp|P0C060|IBPB_SHIFL Small heat shock protein IbpB OS=Shigella flexneri OX=623 GN=ibpB PE=3 SV=1//4.05943e-101
3945837	3946028	191	1.61166	-//-
3946897	3947105	208	1.54272	-//-
4038568	4038827	259	1.80705	gnl|BL_ORD_ID|541343 sp|Q3BAI2|YCX91_PHAAO Uncharacterized protein ORF91 OS=Phalaenopsis aphrodite subsp. formosana OX=308872 PE=4 SV=1//2.01399e-13
4122532	4123081	549	1.19488	gnl|BL_ORD_ID|182210 sp|Q3YV46|HSLV_SHISS ATP-dependent protease subunit HslV OS=Shigella sonnei (strain Ss046) OX=300269 GN=hslV PE=3 SV=1//7.58963e-114
4175564	4175849	285	1.25944	-//-
4180066	4180424	358	1.16953	gnl|BL_ORD_ID|355747 sp|Q3YUZ9|RL10_SHISS 50S ribosomal protein L10 OS=Shigella sonnei (strain Ss046) OX=300269 GN=rplJ PE=3 SV=1//1.20367e-113
4180702	4180933	231	1.18476	gnl|BL_ORD_ID|381221 sp|B7MRB2|RL7_ECO81 50S ribosomal protein L7/L12 OS=Escherichia coli O81 (strain ED1a) OX=585397 GN=rplL PE=3 SV=1//1.58044e-45
4371042	4372376	1334	1.20274	gnl|BL_ORD_ID|61793 sp|Q3YUJ7|CH60_SHISS 60 kDa chaperonin OS=Shigella sonnei (strain Ss046) OX=300269 GN=groL PE=3 SV=1//0
4400831	4401166	335	1.20439	gnl|BL_ORD_ID|171854 sp|P25519|HFLX_ECOLI GTPase HflX OS=Escherichia coli (strain K12) OX=83333 GN=hflX PE=1 SV=3//0
4463276	4463490	214	1.2141	gnl|BL_ORD_ID|274022 sp|P28903|NRDD_ECOLI Anaerobic ribonucleoside-triphosphate reductase OS=Escherichia coli (strain K12) OX=83333 GN=nrdD PE=1 SV=2//0
4464050	4464292	242	1.23372	gnl|BL_ORD_ID|479328 sp|P28904|TREC_ECOLI Trehalose-6-phosphate hydrolase OS=Escherichia coli (strain K12) OX=83333 GN=treC PE=1 SV=3//0
4464630	4466354	1724	1.2069	gnl|BL_ORD_ID|479328 sp|P28904|TREC_ECOLI Trehalose-6-phosphate hydrolase OS=Escherichia coli (strain K12) OX=83333 GN=treC PE=1 SV=3//0
2153558	2153867	309	1.2795	-//-
3194770	3195100	330	1.25019	-//-
3936636	3937032	396	1.17689	gnl|BL_ORD_ID|341174 sp|P02925|RBSB_ECOLI Ribose import binding protein RbsB OS=Escherichia coli (strain K12) OX=83333 GN=rbsB PE=1 SV=1//2.63195e-18
2737291	2737570	279	1.27321	gnl|BL_ORD_ID|543445 sp|P0AD52|YFIA_SHIFL Ribosome-associated factor Y OS=Shigella flexneri OX=623 GN=yfiA PE=3 SV=2//3.41645e-13
