# Supplementary material for: Z3495, a LysR-Type Transcriptional Regulator Encoded in O Island 97, Regulates Virulence Gene Expression in Enterohemorrhagic Escherichia coli O157:H7
Source: Microorganisms. 2024 Jan 10;12(1):140. doi: 10.3390/microorganisms12010140 (PMC10819331; doi:10.3390/microorganisms12010140)
Supplement: Supplementary file 1 [file microorganisms-12-00140-s001.zip › Supplementray Table S1.xlsx]

## Sheet: Sheet1
Strains	Genotype or description	Source or reference
G2734	Wild-type EHEC O157:H7 EDL933	ATCC
ΔOI-97	OI-97 deletion mutant in G2734	This work
Δz3494	z3494 deletion mutant in G2734	This work
Δz3495	z3495 deletion mutant in G2734	This work
Δz3495 compl.	Δz3495 containing pBAD33:z3495	This work
BL21(pz3495-MBP)	BL21 containing pMal-c5X:z3495	This work
Δz3495(pz3495-3×flag)	Δz3495 containing pTR-z3495-3×flag	This work
